# Supplementary material
Source: PubMed Central journal article supplement (PMC7580607)
Supplement: Supp_TableS3.pdf [file Supp_TableS3.pdf]

### Supplemental Table S3: HTS Data Summary

|             | Condition        | Biological Replicate | Total HTS Reads | Spacers Extracted | New Spacers |        |           | Aligned Spacers (31-33bp)* |        |           |           |
|-------------|------------------|----------------------|-----------------|-------------------|-------------|--------|-----------|----------------------------|--------|-----------|-----------|
|             |                  |                      |                 |                   | Total       | 31bp   | 32bp      | 33bp                       | Genome | pCas1-2/3 | pCsy      |
| <b>BC1</b>  | pCas1-2/3 Only   | #1                   | 2,485,942       | 368,477           | 325,852     | 7,181  | 299,831   | 6,119                      | 99     | 172,446   |           |
| <b>BC2</b>  |                  | #2                   | 3,203,584       | 734,524           | 698,002     | 10,922 | 651,127   | 10,226                     | 128    | 366,879   |           |
| <b>BC3</b>  |                  | #3                   | 2,614,507       | 636,992           | 603,640     | 11,436 | 561,265   | 10,082                     | 84     | 283,893   |           |
| <b>BC9</b>  | pCsy + pCas1-2/3 | #1                   | 6,309,887       | 2,604,598         | 2,604,510   | 32,801 | 2,418,309 | 35,251                     | 105    | 1,706,595 | 1,424,206 |
| <b>BC10</b> |                  | #2                   | 3,511,329       | 1,440,015         | 1,439,981   | 14,184 | 1,345,942 | 17,756                     | 170    | 904,611   | 738,699   |

\*Some spacers sequences produced more than one alignment
